# Supplementary material for: Effects of Physical Exercise on Endothelial Function and DNA Methylation
Source: PubMed Central journal article supplement (PMC6678332; doi:10.3390/ijerph16142530), 2019-07-16
Supplement: ijerph-16-02530-s001.pdf [file ijerph-16-02530-s001.pdf]

**Table 1:** Primer sequences and PCR conditions.

| Sequence ID                              | Forward primer (5' to 3')              | Reverse primer (5' to 3')              | Sequencing primer (5' to 3') | PCR conditions                                               |
|------------------------------------------|----------------------------------------|----------------------------------------|------------------------------|--------------------------------------------------------------|
| <b>GLOBAL DNA METHYLATION MARKERS</b>    |                                        |                                        |                              |                                                              |
| <b>ALU</b>                               | biotin-TTTTTATT<br>AAAAATATAAAA ATT    | CCCAAATAAAA<br>TACAATAA                | AATAACTAAAAT<br>TACAAAC      | 96°C for 90"<br>43°C for 60"<br>72°C for 120"<br>(40 cycles) |
| <b>LINE-1</b>                            | TTTTGAGTTAGG<br>TGTGGGATA TA           | biotin-AAAATCAA<br>AAAATTCCCTTTC       | AGTTAGGTGTG<br>GGATATAGT     | 95°C for 30"<br>50°C for 30"<br>72°C for 30"<br>(35 cycles)  |
| <b>GENE-SPECIFIC METHYLATION MARKERS</b> |                                        |                                        |                              |                                                              |
| <b>eNOS</b>                              | TGTAGTTTTAGGGTT<br>TTGTTGGA            | biotin-<br>CCCCTATCCCATAC<br>AAT       | TATTAGTTTTAGT<br>TTTTATA     | 95°C for 1'<br>58°C for 30"<br>72°C for 1'<br>(50 cycles)    |
| <b>Et-1</b>                              | TTGTTTGGGGTTGG<br>AATAAAGT             | biotin-<br>ATCCTCAACCCAAA<br>TACCCTTTT | GGTAGAGAGTTG<br>TTTAAGTT     | 95°C for 1'<br>56°C for 1'<br>72°C for 1'<br>(50 cycles)     |
| <b>iNOS</b>                              | AATGAGAGTTGTTG<br>GGAAGTGTTT           | biotin-<br>CCACCAAACCCAA<br>CCAAACT    | TAAAGGTATTTTT<br>GTTTTAA     | 95°C for 1'<br>60°C for 1'<br>72°C for 1'<br>(45 cycles)     |
| <b>ICAM</b>                              | biotin-<br>TGAGGGGTATTTTTG<br>ATGTTTGT | ACTAAAAAATACCC<br>CTCCCCCTAA           | TCCACACCTAAC<br>AC           | 95°C for 1'<br>56°C for 1'<br>72°C for 1'<br>(45 cycles)     |
| <b>TLR2</b>                              | GTTTTTTTTTGATTT<br>GGAATTTT            | biotin-TTCCAAAC<br>AAATAACCCC          | GGAGTTTGTTGG<br>GAAGTA       | 95°C for 1'<br>54,5°C for 1'<br>72°C for 1'<br>(45 cycles)   |
| <b>TNF-alpha</b>                         | biotin-<br>TGAGGGGTATTTTTG<br>ATGTTTGT | CCAACAACCTACCTT<br>TATATATCCC          | ATAAACCCCTACAC<br>CTCTAT     | 95°C for 1'<br>57°C for 1'<br>72°C for 1'<br>(50 cycles)     |
